# Supplementary material for: A Systematic Review of the Current Status and Quality of Radiomics for Glioma Differential Diagnosis
Source: MDPI journal article supplement (doi:10.3390/cancers14112731), 2022-05-31
Supplement: s1 [file s1]

## *Supplementary Material*

### **A systematic review on the current status and quality of radiomics for glioma differential diagnosis.**

**Valentina Brancato<sup>1</sup>, Marco Cerrone<sup>1,\*</sup>, Maria Luisa Lavitrano<sup>2</sup>, Marco Salvatore<sup>1</sup>, Carlo Cavaliere<sup>1</sup>**

<sup>1</sup>IRCCS Synlab SDN, via E.Gianturco 113, 80143, Naples, Italy.

<sup>2</sup>School of Medicine and Surgery, University of Milano-Bicocca, via Cadore 48, 20900 Monza, Italy

#### **S1. Key Search Terms**

- (“radiomics” OR “texture” OR “histogram”) AND (“Glioma”) AND (“Diagnosis”)
- (“radiomics” OR “texture” OR “histogram”) AND (“Glioma”) AND (“Differential Diagnosis”)
- (“radiomics” OR “texture” OR “histogram”) AND (“MRI” OR “Magnetic Resonance Imaging”) AND (“Glioma”)
- (“radiomics” OR “texture” OR “histogram”) AND (“CT” OR “Computed Tomography”) AND (“Glioma”)
- (“radiomics” OR “texture” OR “histogram”) AND (“PET” OR “Positron Emission Tomography”) AND (“Glioma”)
- (“radiomics” OR “texture” OR “histogram”) AND (“MRI” OR “Magnetic Resonance Imaging”) AND (“Glioma”) AND (“Diagnosis”)
- (“radiomics” OR “texture” OR “histogram”) AND (“CT” OR “Computed Tomography”) AND (“Glioma”) AND (“Diagnosis”)
- (“radiomics” OR “texture” OR “histogram”) AND (“PET” OR “Positron Emission Tomography”) AND (“Glioma”) AND (“Diagnosis”)
- (“radiomics” OR “texture” OR “histogram”) AND (“Glioma”) AND (“PCNSL” OR “Primary CNS lymphoma” OR “primary central nervous system lymphoma”)
- (“radiomics” OR “texture” OR “histogram”) AND (“Glioma”) AND (“metastasis” OR “metastases”)
- (“radiomics” OR “texture” OR “histogram”) AND (“Glioma”) AND (“brain inflammation”)
- (“radiomics” OR “texture” OR “histogram”) AND (“Glioma”) AND (“brain abscess”)
- (“radiomics” OR “texture” OR “histogram”) AND (“Glioma”) AND (“brain disease”)

#### **S2. PRISMA Checklist**

## *Supplementary Material*

| Section and Topic             | Item # | Checklist item                                                                                                                                                                                                                                                                                       | Location where item is reported |
|-------------------------------|--------|------------------------------------------------------------------------------------------------------------------------------------------------------------------------------------------------------------------------------------------------------------------------------------------------------|---------------------------------|
| <b>TITLE</b>                  |        |                                                                                                                                                                                                                                                                                                      |                                 |
| Title                         | 1      | Identify the report as a systematic review.                                                                                                                                                                                                                                                          | 1                               |
| <b>ABSTRACT</b>               |        |                                                                                                                                                                                                                                                                                                      |                                 |
| Abstract                      | 2      | See the PRISMA 2020 for Abstracts checklist.                                                                                                                                                                                                                                                         | 1                               |
| <b>INTRODUCTION</b>           |        |                                                                                                                                                                                                                                                                                                      |                                 |
| Rationale                     | 3      | Describe the rationale for the review in the context of existing knowledge.                                                                                                                                                                                                                          | 2                               |
| Objectives                    | 4      | Provide an explicit statement of the objective(s) or question(s) the review addresses.                                                                                                                                                                                                               | 3                               |
| <b>METHODS</b>                |        |                                                                                                                                                                                                                                                                                                      |                                 |
| Eligibility criteria          | 5      | Specify the inclusion and exclusion criteria for the review and how studies were grouped for the syntheses.                                                                                                                                                                                          | 3                               |
| Information sources           | 6      | Specify all databases, registers, websites, organisations, reference lists and other sources searched or consulted to identify studies. Specify the date when each source was last searched or consulted.                                                                                            | 3                               |
| Search strategy               | 7      | Present the full search strategies for all databases, registers and websites, including any filters and limits used.                                                                                                                                                                                 | 3                               |
| Selection process             | 8      | Specify the methods used to decide whether a study met the inclusion criteria of the review, including how many reviewers screened each record and each report retrieved, whether they worked independently, and if applicable, details of automation tools used in the process.                     | 3-4                             |
| Data collection process       | 9      | Specify the methods used to collect data from reports, including how many reviewers collected data from each report, whether they worked independently, any processes for obtaining or confirming data from study investigators, and if applicable, details of automation tools used in the process. | 3-4                             |
| Data items                    | 10a    | List and define all outcomes for which data were sought. Specify whether all results that were compatible with each outcome domain in each study were sought (e.g. for all measures, time points, analyses), and if not, the methods used to decide which results to collect.                        | 4                               |
|                               | 10b    | List and define all other variables for which data were sought (e.g. participant and intervention characteristics, funding sources). Describe any assumptions made about any missing or unclear information.                                                                                         | 4                               |
| Study risk of bias assessment | 11     | Specify the methods used to assess risk of bias in the included studies, including details of the tool(s) used, how many reviewers assessed each study and whether they worked independently, and if applicable, details of automation tools used in the process.                                    | 4                               |
| Effect measures               | 12     | Specify for each outcome the effect measure(s) (e.g. risk ratio, mean difference) used in the synthesis or presentation of results.                                                                                                                                                                  | NA                              |
| Synthesis methods             | 13a    | Describe the processes used to decide which studies were eligible for each synthesis (e.g. tabulating the study intervention characteristics and comparing against the planned groups for each synthesis (item #5)).                                                                                 | NA                              |
|                               | 13b    | Describe any methods required to prepare the data for presentation or synthesis, such as handling of missing summary                                                                                                                                                                                 | NA                              |

## Supplementary Material

| Section and Topic             | Item # | Checklist item                                                                                                                                                                                                                                                                       | Location where item is reported |
|-------------------------------|--------|--------------------------------------------------------------------------------------------------------------------------------------------------------------------------------------------------------------------------------------------------------------------------------------|---------------------------------|
|                               |        | statistics, or data conversions.                                                                                                                                                                                                                                                     |                                 |
|                               | 13c    | Describe any methods used to tabulate or visually display results of individual studies and syntheses.                                                                                                                                                                               | NA                              |
|                               | 13d    | Describe any methods used to synthesize results and provide a rationale for the choice(s). If meta-analysis was performed, describe the model(s), method(s) to identify the presence and extent of statistical heterogeneity, and software package(s) used.                          | NA                              |
|                               | 13e    | Describe any methods used to explore possible causes of heterogeneity among study results (e.g. subgroup analysis, meta-regression).                                                                                                                                                 | NA                              |
|                               | 13f    | Describe any sensitivity analyses conducted to assess robustness of the synthesized results.                                                                                                                                                                                         | NA                              |
| Reporting bias assessment     | 14     | Describe any methods used to assess risk of bias due to missing results in a synthesis (arising from reporting biases).                                                                                                                                                              | NA                              |
| Certainty assessment          | 15     | Describe any methods used to assess certainty (or confidence) in the body of evidence for an outcome.                                                                                                                                                                                | NA                              |
| <b>RESULTS</b>                |        |                                                                                                                                                                                                                                                                                      |                                 |
| Study selection               | 16a    | Describe the results of the search and selection process, from the number of records identified in the search to the number of studies included in the review, ideally using a flow diagram.                                                                                         | 4-5                             |
|                               | 16b    | Cite studies that might appear to meet the inclusion criteria, but which were excluded, and explain why they were excluded.                                                                                                                                                          | 4-5                             |
| Study characteristics         | 17     | Cite each included study and present its characteristics.                                                                                                                                                                                                                            | 5-14, Table 1                   |
| Risk of bias in studies       | 18     | Present assessments of risk of bias for each included study.                                                                                                                                                                                                                         | NA                              |
| Results of individual studies | 19     | For all outcomes, present, for each study: (a) summary statistics for each group (where appropriate) and (b) an effect estimate and its precision (e.g. confidence/credible interval), ideally using structured tables or plots.                                                     | NA                              |
| Results of syntheses          | 20a    | For each synthesis, briefly summarise the characteristics and risk of bias among contributing studies.                                                                                                                                                                               | 14-15                           |
|                               | 20b    | Present results of all statistical syntheses conducted. If meta-analysis was done, present for each the summary estimate and its precision (e.g. confidence/credible interval) and measures of statistical heterogeneity. If comparing groups, describe the direction of the effect. | 15                              |
|                               | 20c    | Present results of all investigations of possible causes of heterogeneity among study results.                                                                                                                                                                                       | NA                              |
|                               | 20d    | Present results of all sensitivity analyses conducted to assess the robustness of the synthesized results.                                                                                                                                                                           | NA                              |
| Reporting biases              | 21     | Present assessments of risk of bias due to missing results (arising from reporting biases) for each synthesis assessed.                                                                                                                                                              | NA                              |
| Certainty of evidence         | 22     | Present assessments of certainty (or confidence) in the body of evidence for each outcome assessed.                                                                                                                                                                                  | NA                              |
| <b>DISCUSSION</b>             |        |                                                                                                                                                                                                                                                                                      |                                 |

## Supplementary Material

| Section and Topic                              | Item # | Checklist item                                                                                                                                                                                                                             | Location where item is reported |
|------------------------------------------------|--------|--------------------------------------------------------------------------------------------------------------------------------------------------------------------------------------------------------------------------------------------|---------------------------------|
| Discussion                                     | 23a    | Provide a general interpretation of the results in the context of other evidence.                                                                                                                                                          | 15-16                           |
|                                                | 23b    | Discuss any limitations of the evidence included in the review.                                                                                                                                                                            | 16                              |
|                                                | 23c    | Discuss any limitations of the review processes used.                                                                                                                                                                                      | 16                              |
|                                                | 23d    | Discuss implications of the results for practice, policy, and future research.                                                                                                                                                             | 16                              |
| <b>OTHER INFORMATION</b>                       |        |                                                                                                                                                                                                                                            |                                 |
| Registration and protocol                      | 24a    | Provide registration information for the review, including register name and registration number, or state that the review was not registered.                                                                                             | NA                              |
|                                                | 24b    | Indicate where the review protocol can be accessed, or state that a protocol was not prepared.                                                                                                                                             | NA                              |
|                                                | 24c    | Describe and explain any amendments to information provided at registration or in the protocol.                                                                                                                                            | NA                              |
| Support                                        | 25     | Describe sources of financial or non-financial support for the review, and the role of the funders or sponsors in the review.                                                                                                              | NA                              |
| Competing interests                            | 26     | Declare any competing interests of review authors.                                                                                                                                                                                         | 18                              |
| Availability of data, code and other materials | 27     | Report which of the following are publicly available and where they can be found: template data collection forms; data extracted from included studies; data used for all analyses; analytic code; any other materials used in the review. | NA                              |

From: Page MJ, McKenzie JE, Bossuyt PM, Boutron I, Hoffmann TC, Mulrow CD, et al. The PRISMA 2020 statement: an updated guideline for reporting systematic reviews. BMJ 2021;372:n71. doi: 10.1136/bmj.n71

### S3. Radiomics Quality Score items

**Table S1.** RQS checkpoints, items and points for each item.

| RQS Checkpoint      | RQS Item                                                                                                                                                                                           | RQS points                                                                   |
|---------------------|----------------------------------------------------------------------------------------------------------------------------------------------------------------------------------------------------|------------------------------------------------------------------------------|
| <i>Checkpoint 1</i> | <b>Image protocol quality</b> - well-documented image protocols (for example, contrast, slice thickness, energy, etc.) and/or usage of public image protocols allow reproducibility/replicability. | +1 (if protocols are well-documented)<br><br>+1 (if public protocol is used) |
| <i>Checkpoint 2</i> | <b>Multiple segmentations</b> - possible actions are: segmentation by different physicians/algorithms/software, perturbing segmentations by (random) noise, segmentation at different              | +1                                                                           |

## *Supplementary Material*

|                     |                                                                                                                                                                                                                                          |                                                                                 |
|---------------------|------------------------------------------------------------------------------------------------------------------------------------------------------------------------------------------------------------------------------------------|---------------------------------------------------------------------------------|
|                     | breathing cycles. Analyse feature robustness to segmentation variabilities.                                                                                                                                                              |                                                                                 |
|                     | <b>Phantom study on all scanners</b> - detect inter-scanner differences and vendor-dependent features. Analyse feature robustness to these sources of variability.                                                                       | +1                                                                              |
|                     | <b>Imaging at multiple time points</b> - collect images of individuals at additional time points. Analyse feature robustness to temporal variabilities (for example, organ movement, organ expansion/ shrinkage).                        | +1                                                                              |
| <i>Checkpoint 3</i> | <b>Feature reduction</b> or adjustment for multiple testing - decreases the risk of overfitting. Overfitting is inevitable if the number of features exceeds the number of samples. Consider feature robustness when selecting features. | -3 (if neither measure is implemented)<br>+3 (if either measure is implemented) |
|                     | <b>Multivariable analysis with non radiomics features</b> (for example, EGFR mutation) - is expected to provide a more holistic model. Permits correlating/inferencing between radiomics and non radiomics features.                     | +1                                                                              |
|                     | <b>Detect and discuss biological correlates</b> - demonstration of phenotypic differences (possibly associated with underlying gene–protein expression patterns) deepens understanding of radiomics and biology.                         | +1                                                                              |
|                     | <b>Cut-off analyses</b> - determine risk groups by either the median, a previously published cut-off or report a continuous risk variable. Reduces the risk of reporting overly optimistic results.                                      | +1                                                                              |

## *Supplementary Material*

|  |                                                                                                                                                                                                                                                                                                              |                                                                                                                                                                                                                                                                                                                                         |
|--|--------------------------------------------------------------------------------------------------------------------------------------------------------------------------------------------------------------------------------------------------------------------------------------------------------------|-----------------------------------------------------------------------------------------------------------------------------------------------------------------------------------------------------------------------------------------------------------------------------------------------------------------------------------------|
|  | <p><b>Discrimination statistics</b> - report discrimination statistics (for example, C-statistic, ROC curve, AUC) and their statistical significance (for example, p-values, confidence intervals). One can also apply resampling method (for example, bootstrapping, cross-validation).</p>                 | <p>+1 (if a discrimination statistic and its statistical significance are reported)</p> <p>+1 (if a resampling method technique is also applied)</p>                                                                                                                                                                                    |
|  | <p><b>Calibration statistics</b> - report calibration statistics (for example, Calibration-in-the-large/slope, calibration plots) and their statistical significance (for example, P-values, confidence intervals). One can also apply resampling method (for example, bootstrapping, cross-validation).</p> | <p>+1 (if a calibration statistic and its statistical significance are reported)</p> <p>+1 (if a resampling method technique is also applied)</p>                                                                                                                                                                                       |
|  | <p><b>Prospective study registered in a trial database</b> - provides the highest level of evidence supporting the clinical validity and usefulness of the radiomics biomarker.</p>                                                                                                                          | <p>+7 (for prospective validation of a radiomics signature in an appropriate trial)</p>                                                                                                                                                                                                                                                 |
|  | <p><b>Validation</b> - the validation is performed without retraining and without adaptation of the cut-off value, provides crucial information with regard to credible clinical performance.</p>                                                                                                            | <p>-5 (if validation is missing)</p> <p>+2 (if validation is based on a dataset from the same institute)</p> <p>+3 (if validation is based on a dataset from another institute)</p> <p>+4 (if validation is based on two datasets from two distinct institutes)</p> <p>+4 (if the study validates a previously published signature)</p> |

## *Supplementary Material*

|  |                                                                                                                                                                                                                                                          |                                                                                                                                                                                                                                                                                              |
|--|----------------------------------------------------------------------------------------------------------------------------------------------------------------------------------------------------------------------------------------------------------|----------------------------------------------------------------------------------------------------------------------------------------------------------------------------------------------------------------------------------------------------------------------------------------------|
|  |                                                                                                                                                                                                                                                          | <p>+5 (if validation is based on three or more datasets from distinct institutes)</p> <p>*Datasets should be of comparable size and should have at least 10 events per model feature.</p>                                                                                                    |
|  | <p><b>Comparison to ‘gold standard’</b> - assess the extent to which the model agrees with/is superior to the current ‘gold standard’ method (for example, TNM-staging for survival prediction). This comparison shows the added value of radiomics.</p> | +2                                                                                                                                                                                                                                                                                           |
|  | <p><b>Potential clinical utility</b> - report on the current and potential application of the model in a clinical setting (for example, decision curve analysis).</p>                                                                                    | +2                                                                                                                                                                                                                                                                                           |
|  | <p><b>Cost-effectiveness analysis</b> - report on the cost-effectiveness of the clinical application (for example, QALYs generated).</p>                                                                                                                 | +1                                                                                                                                                                                                                                                                                           |
|  | <p><b>Open science and data</b> - make code and data publicly available. Open science facilitates knowledge transfer and reproducibility of the study.</p>                                                                                               | <p>+1 (if scans are open source)</p> <p>+1 (if region of interest segmentations are open source)</p> <p>+1 (if code is open source)</p> <p>+1 (if radiomics features are calculated on a set of representative ROIs and the calculated features and representative ROIs are open source)</p> |

## *Supplementary Material*

### S4. Journal Metrics

**Table S2.** Journal metrics of the included studies.

| Authors, Year             | Journal                                | IF of the year of publication | 5 Year IF | CiteScore | H-index | H-index first author | H-index first author no self citations |
|---------------------------|----------------------------------------|-------------------------------|-----------|-----------|---------|----------------------|----------------------------------------|
| Choi et al., 2016         | European Radiology                     | 3.967                         | 4.714     | 4.08      | 134     | 9                    | 9                                      |
| Alcaide-Leon et al., 2017 | AJNR                                   | 3.653                         | 3.268     | 3.28      | 162     | 8                    | 8                                      |
| Chen et al., 2017         | International Journal of Neuroscience  | 1.848                         | 1.96      | 1.58      | 57      | 14                   | 14                                     |
| Wu et al., 2017           | IEEE - Transactions on Medical Imaging | 6.131                         | 13.308    | 8.58      | 195     | 1                    | 1                                      |
| Artzi et al., 2019        | JOURNAL OF MAGNETIC RESONANCE IMAGING  | 3.732                         | 4.475     | 7.8       | 160     | 17                   | 17                                     |
| Kang et al., 2018         | Neuro-oncology                         | 9.384                         | 7.7       | 16.1      | 113     | 1                    | 1                                      |
| Kim et al., 2018          | Neuroradiology                         | 2.504                         | 2.274     | 4.0       | 91      | 11                   | 11                                     |
| Kunimatsu., 2018          | MRMS                                   | 1.455                         | 1.78      | 1.48      | 35      | 28                   | 27                                     |
| Nakagawa et al., 2018     | European Journal of Radiology          | 2.948                         | 3.279     | 4.8       | 109     | 4                    | 4                                      |
| Suh et al., 2018          | European Radiology                     | 3.962                         | 4.714     | 6.9       | 143     | 3                    | 3                                      |
| Xiao et al., 2018         | Clinical Neurology and Neurosurgery    | 1.672                         | 1.838     | 2.7       | 69      | 2                    | 2                                      |
| Bao et al., 2019          | MRMS                                   | 1.481                         | 1.78      | 3.2       | 37      | 1                    | 1                                      |
| Chen et al., 2019         | FRONTIERS IN ONCOLOGY                  | 4.848                         | 5.729     | 3.9       | 83      | 7                    | 7                                      |
| Dong et al., 2019         | European Radology                      | 5.315                         | 4.714     | 7.7       | 149     | 11                   | 11                                     |



## *Supplementary Material*

|                           |                                       |       |       |      |     |    |    |
|---------------------------|---------------------------------------|-------|-------|------|-----|----|----|
| Kong et al., 2019         | Neuroimage: Clinical                  | 4.35  | 4.924 | 7.0  | 68  | 9  | 9  |
| Kumimatsu et al., 2019    | MRMS                                  | 1.481 | 1.78  | 3.2  | 37  | 31 | 31 |
| Petrujkic et al., 2019    | European Journal of Radiology         | 2.687 | 3.279 | 4.6  | 115 | 1  | 1  |
| Quian et al., 2019        | Cancer letters                        | 6.509 | 8.033 | 14.0 | 182 | 16 | 15 |
| Wang et al., 2019         | Chinese Medical Sciences Journal      | 0.533 | 0.746 | 1.5  | 21  | 4  | 3  |
| Yun et al., 2019          | Scientific Reports                    | 4.011 | 4.409 | 7.1  | 213 | 4  | 4  |
| Bae et al., 2020          | Scientific Reports                    | 4.379 | 4.409 | 7.1  | 213 | 9  | 9  |
| Dastmalchian et al., 2020 | Eur J Nucl Med Mol Imaging            | 9.236 | 5.618 | 11.6 | 163 | 6  | 6  |
| Chen et al., 2020         | Frontiers in oncology                 | 6.244 | 5.729 | 4.6  | 83  | 8  | 8  |
| Dong et al., 2020         | Academic Radiology                    | 3.173 | 2.582 | 4.7  | 96  | 2  | 2  |
| Ortiz-Ramon et al., 2020  | Physica Medica                        | 2.685 | 2.634 | 4.2  | 44  | 4  | 4  |
| Xia et al., 2020          | JMRI                                  | 4.813 | 4.475 | 7.8  | 160 | 11 | 10 |
| Zhou et al., 2020         | AJNR                                  | 3.825 | 3.268 | 5.8  | 177 | 8  | 8  |
| Csutak et al., 2020       | Brain Sciences                        | 3.394 | 3.703 | 3.0  | 44  | 5  | 4  |
| Xia et al., 2021          | JOURNAL OF MAGNETIC RESONANCE IMAGING | 4.813 | 4.475 | 7.8  | 160 | 11 | 10 |
| Bathla et al., 2021       | European Radiology                    | 5.315 | 4.714 | 7.7  | 149 | 15 | 15 |
| Priya et al., 2021        | Cancers                               | 6.102 | 6.275 | 4.4  | 76  | 4  | 4  |
| De Causans at al., 2021   | FRONTIERS IN ONCOLOGY                 | 6.244 | 5.729 | 3.9  | 83  | 1  | 1  |

## *Supplementary Material*

|                         |                                             |       |       |     |     |    |    |
|-------------------------|---------------------------------------------|-------|-------|-----|-----|----|----|
| Zhang et al., 2021      | FRONTIERS IN ONCOLOGY                       | 6.244 | 5.729 | 3.9 | 83  | 0  | 0  |
| Han et al., 2021        | European Journal of Radiology               | 3.528 | 3.279 | 4.6 | 115 | 11 | 10 |
| Han et al., 2021        | Frontiers in Cell and Developmental Biology | 6.684 | 6.079 | 2.7 | 53  | 7  | 7  |
| Priya et al. a, 2021    | Scientific Reports                          | 4.379 | 4.409 | 7.1 | 213 | 4  | 4  |
| Priya et al. b, 2021    | The Neuroradiology Journal                  | 1.512 | 1.63  | 2.5 | 22  | 4  | 4  |
| Santoretti et al., 2021 | Scientific Reports                          | 4.379 | 4.409 | 7.1 | 213 | 8  | 6  |
| Su et al., 2021         | Clinical Radiology                          | 2.35  | 2.247 | 3.9 | 90  | 6  | 6  |
| Xiao et al., 2021       | Journal of integrative Neuroscience         | 2.117 | 1.463 | 1.8 | 33  | 4  | 4  |
| Bo et al., 2021         | Frontiers in medicine                       | 11.48 | 4.557 | 4.1 | 39  | 0  | 0  |
| Marginean et al., 2022  | Brain Sciences                              | 3.114 | 3.32  | 3.0 | 33  | 1  | 1  |

### **S5. Abbreviations for Table 1**

R= retrospective; P= prospective; PCNSL = Primary Central Nervous System Lymphoma; GBM= Glioblastoma Multiforme; MET= metastasis; EP= Ependymoma; MB=meduloblastoma; PA = pilocytic astrocytoma; HGGs= High grade gliomas; NP= Number of Patients; CE-T1WI = Contrast Enhancement T1 Weighted Imaging; AUC= Area under the curve; IAUC= Initial Area Under the Curve; ADC= Apparent diffusion coefficient; T2-WI= T2 weighted imaging; Flair= Fluid Attenuated Inversion Recovery; DWI= diffusion weighted imaging; rCBV= relative cerebral blood volume; SUV = standardized uptake value; NCC= normal contralateral cortex; NBM= normal brain mean; FDG= fluorodeoxyglucose; APTw= Amide Proton Transfer weighted; CT= Computized Tomography; S= semiautomatic; 3D= three dimensions; M= manual; A= automatic; 2D= two dimensions; SEG= segmentation; MIPAV= Medical Imaging Processing Analysis & Visualization; NR= not reported; SIFT= Scale Invariant Feature Transform; LoG= Logdomain wavelet filters; NN= L= Deep Transfer Learning; FS= Feature Selection;

## Supplementary Material

SVM= Support Vector Machine; NCA= Neighborhood component analysis; PCA= Principal Component Analysis; mRMR= minimum redundancy maximum relevance; ICC= Intraclass Correlation Coefficient; RF= Random Forest; GBDT= Gradient Boosting Decision Tree; CFS = Correlation-based Feature Selection; MLP= Multilayer Perceptron; MWW= Mann-Whitney-Wilcoxon; MIC= Maximal Information Coefficient; TPOT= Tree-based pipeline optimization tool; CM= Classification Model ; KNN= k-nearest neighbor; DT= Decision Tree; BoF= Bag of Features; NB= Naïve Bayes; LDA= Linear Discriminant analysis; RF= Random Forest; AB= Adaboost ; LR= Linear Regression ; NN= Neural Network; L-SVM= Linear Kernel; DNN= Deep Neural Network; VM= Validation Method ; LOOCV= Leave One Out Cross Validation; CV= Cross Validation; SRR= Spars representation-based radiomics; CNN= Convolutional Neural Network; BM= Brain Metastasis; IMD= Intracranial Metastatic Disease; HCR= Hand Crafted Radiomics; DTL= Deep Transfer Learning.

### S6. Radiomics Quality Score assessment

**Table S3.** Details of methodological quality assessment by Radiomic quality score (RQS) tool.

| Author                    | Image protocol quality | Multiple segmentations | Phantom study on all scanners | Imaging at multiple time points | Feature reduction or adjustment for multiple testing | Multivariable analysis with non radiomics features | Detect and discuss biological correlates | Cut-off analyses | Discrimination statistics | Calibration statistics | Prospective study registered in a trial database | Validation | Comparison to gold standard | Potential clinical utility | Cost-effectiveness analysis | Open science and data | Total       |
|---------------------------|------------------------|------------------------|-------------------------------|---------------------------------|------------------------------------------------------|----------------------------------------------------|------------------------------------------|------------------|---------------------------|------------------------|--------------------------------------------------|------------|-----------------------------|----------------------------|-----------------------------|-----------------------|-------------|
| Choi et al., 2016         | 1                      | 0                      | 0                             | 0                               | -3                                                   | 0                                                  | 0                                        | 1                | 2                         | 0                      | 0                                                | -5         | 0                           | 0                          | 0                           | 0                     | 0 (0%)      |
| Alcaide-Leon et al., 2017 | 1                      | 1                      | 0                             | 0                               | 3                                                    | 0                                                  | 0                                        | 1                | 2                         | 0                      | 0                                                | -5         | 0                           | 0                          | 0                           | 0                     | 3 (8,33%)   |
| Chen et al., 2017         | 1                      | 1                      | 0                             | 0                               | 3                                                    | 0                                                  | 0                                        | 1                | 2                         | 0                      | 7                                                | 2          | 0                           | 2                          | 0                           | 0                     | 19 (52,78%) |
| Wu et al., 2017           | 1                      | 0                      | 0                             | 1                               | 3                                                    | 1                                                  | 1                                        | 0                | 2                         | 0                      | 0                                                | 2          | 0                           | 0                          | 0                           | 0                     | 11 (30,56%) |
| Artzi et al., 2019        | 1                      | 0                      | 0                             | 0                               | 3                                                    | 0                                                  | 0                                        | 0                | 2                         | 0                      | 0                                                | 2          | 0                           | 2                          | 0                           | 0                     | 10 (27,78%) |
| Kang et al., 2018         | 1                      | 1                      | 0                             | 0                               | 3                                                    | 1                                                  | 0                                        | 1                | 2                         | 0                      | 0                                                | 3          | 2                           | 2                          | 0                           | 1                     | 17 (47,22%) |
| Kim et al., 2018          | 1                      | 1                      | 0                             | 1                               | 3                                                    | 0                                                  | 0                                        | 1                | 2                         | 0                      | 0                                                | 3          | 0                           | 2                          | 0                           | 1                     | 15 (41,67%) |
| Kunimatsu., 2018          | 1                      | 1                      | 0                             | 0                               | 3                                                    | 0                                                  | 0                                        | 0                | 0                         | 0                      | 0                                                | -5         | 0                           | 0                          | 0                           | 0                     | 0 (0%)      |
| Nakagawa et al., 2018     | 1                      | 0                      | 0                             | 1                               | 3                                                    | 0                                                  | 0                                        | 1                | 2                         | 0                      | 0                                                | -5         | 0                           | 2                          | 0                           | 0                     | 5 (13,89%)  |
| Suh et al., 2018          | 1                      | 1                      | 0                             | 1                               | 3                                                    | 0                                                  | 0                                        | 1                | 2                         | 0                      | 0                                                | 2          | 2                           | 2                          | 0                           | 1                     | 16 (44,44%) |
| Xiao et al., 2018         | 1                      | 0                      | 0                             | 1                               | 3                                                    | 0                                                  | 0                                        | 1                | 2                         | 0                      | 0                                                | -5         | 0                           | 2                          | 0                           | 0                     | 5 (13,89%)  |

## Supplementary Material

|                           |   |   |   |   |    |   |   |   |   |   |   |    |   |   |   |   |             |
|---------------------------|---|---|---|---|----|---|---|---|---|---|---|----|---|---|---|---|-------------|
| Bao et al., 2019          | 1 | 0 | 0 | 0 | -3 | 0 | 0 | 0 | 1 | 0 | 0 | -5 | 0 | 0 | 0 | 0 | 0 (0%)      |
| Chen et al., 2019         | 2 | 1 | 1 | 0 | 3  | 0 | 0 | 0 | 2 | 0 | 0 | 2  | 0 | 2 | 0 | 1 | 14 (38,89%) |
| Dong et al., 2019         | 1 | 0 | 0 | 0 | 3  | 0 | 0 | 0 | 2 | 0 | 0 | 2  | 0 | 2 | 0 | 0 | 10 (27,78%) |
| Kong et al., 2019         | 1 | 0 | 0 | 0 | 3  | 0 | 0 | 0 | 2 | 0 | 0 | 2  | 2 | 0 | 0 | 0 | 10 (27,78%) |
| Kumimatsu et al., 2019    | 1 | 0 | 0 | 0 | 3  | 0 | 0 | 1 | 2 | 0 | 0 | 2  | 0 | 2 | 0 | 1 | 12 (33,33%) |
| Petrujkic et al., 2019    | 1 | 0 | 0 | 0 | -3 | 0 | 0 | 0 | 2 | 0 | 0 | -5 | 0 | 0 | 0 | 0 | 0 (0%)      |
| Quian et al., 2019        | 1 | 1 | 0 | 0 | 3  | 0 | 0 | 0 | 2 | 0 | 0 | 2  | 0 | 0 | 0 | 1 | 10 (27,78%) |
| Wang et al., 2019         | 1 | 1 | 0 | 0 | -3 | 0 | 0 | 1 | 1 | 0 | 0 | -5 | 0 | 0 | 0 | 0 | 0 (0%)      |
| Yun et al., 2019          | 1 | 0 | 1 | 0 | 3  | 0 | 0 | 1 | 2 | 0 | 0 | 4  | 0 | 2 | 0 | 1 | 15 (41,67%) |
| Bae et al., 2020          | 1 | 1 | 0 | 0 | 3  | 0 | 0 | 0 | 2 | 0 | 0 | 3  | 0 | 2 | 0 | 0 | 12 (33,33%) |
| Dastmalchian et al., 2020 | 1 | 1 | 0 | 0 | 3  | 0 | 0 | 0 | 2 | 0 | 7 | -5 | 0 | 2 | 0 | 0 | 11 (30,56%) |
| Chen et al., 2020         | 1 | 1 | 0 | 0 | 3  | 0 | 1 | 0 | 2 | 0 | 0 | 2  | 0 | 0 | 0 | 1 | 11 (30,56%) |
| Dong et al., 2020         | 1 | 1 | 0 | 0 | 3  | 0 | 0 | 0 | 2 | 0 | 0 | -5 | 0 | 2 | 0 | 0 | 4 (11,11%)  |
| Ortiz-Ramon et al., 2020  | 1 | 0 | 0 | 0 | 3  | 0 | 0 | 0 | 2 | 0 | 0 | 2  | 0 | 2 | 0 | 0 | 10 (27,78%) |
| Xia et al., 2020          | 1 | 1 | 1 | 0 | 3  | 0 | 0 | 1 | 2 | 0 | 0 | 3  | 2 | 2 | 0 | 0 | 16 (44,44%) |
| Zhou et al., 2020         | 1 | 1 | 0 | 0 | 3  | 0 | 0 | 0 | 2 | 0 | 0 | 2  | 0 | 2 | 0 | 0 | 11 (30,56%) |
| Csutak et al., 2020       | 1 | 1 | 0 | 0 | 3  | 0 | 0 | 1 | 1 | 0 | 0 | -5 | 0 | 0 | 0 | 0 | 2 (5,55%)   |
| Xia et al., 2021          | 1 | 1 | 0 | 0 | 3  | 0 | 0 | 0 | 2 | 0 | 0 | 2  | 2 | 2 | 0 | 0 | 13 (36,11%) |
| Bathla et al., 2021       | 1 | 1 | 0 | 0 | 3  | 0 | 0 | 0 | 2 | 1 | 0 | -5 | 0 | 0 | 0 | 0 | 3 (8,33%)   |
| Priya et al., 2021        | 1 | 0 | 0 | 0 | 3  | 0 | 0 | 0 | 2 | 0 | 0 | -5 | 0 | 0 | 0 | 0 | 1 (2,78%)   |
| De Causans et al., 2021   | 1 | 1 | 0 | 0 | 3  | 0 | 0 | 0 | 2 | 0 | 0 | 2  | 0 | 0 | 0 | 0 | 9 (25%)     |
| Zhang et al., 2021        | 1 | 1 | 0 | 0 | 3  | 0 | 0 | 0 | 2 | 0 | 0 | 2  | 0 | 0 | 0 | 0 | 9 (25%)     |
| Han et al., 2021          | 1 | 1 | 0 | 0 | 3  | 1 | 0 | 0 | 2 | 1 | 0 | 3  | 2 | 2 | 0 | 0 | 16 (44,44%) |

## *Supplementary Material*

|                         |   |   |   |   |   |   |   |   |   |   |   |    |   |   |   |   |                |
|-------------------------|---|---|---|---|---|---|---|---|---|---|---|----|---|---|---|---|----------------|
| Han et al., 2021        | 1 | 1 | 0 | 0 | 3 | 0 | 0 | 0 | 2 | 0 | 0 | 2  | 2 | 2 | 0 | 0 | 13<br>(36,11%) |
| Priya et al. a, 2021    | 2 | 0 | 0 | 0 | 3 | 0 | 0 | 0 | 2 | 0 | 0 | -5 | 0 | 2 | 0 | 1 | 5 (13,89%)     |
| Priya et al. b, 2021    | 1 | 0 | 0 | 0 | 3 | 0 | 0 | 0 | 2 | 0 | 0 | -5 | 0 | 0 | 0 | 0 | 1 (2,78%)      |
| Santoretti et al., 2021 | 1 | 0 | 0 | 0 | 3 | 0 | 0 | 0 | 2 | 0 | 0 | 2  | 0 | 0 | 0 | 1 | 9 (25%)        |
| Su et al., 2021         | 1 | 1 | 0 | 0 | 3 | 0 | 0 | 0 | 2 | 0 | 0 | 2  | 0 | 0 | 0 | 0 | 9 (25%)        |
| Xiao et al., 2021       | 1 | 1 | 0 | 0 | 3 | 1 | 0 | 1 | 2 | 0 | 0 | 2  | 0 | 2 | 0 | 0 | 13<br>(36,11%) |
| Bo et al., 2021         | 1 | 1 | 0 | 0 | 3 | 0 | 0 | 1 | 2 | 0 | 0 | 2  | 2 | 0 | 0 | 3 | 15<br>(41,67%) |
| Marginean et al., 2022  | 1 | 0 | 0 | 0 | 3 | 0 | 0 | 1 | 1 | 0 | 0 | -5 | 0 | 0 | 0 | 0 | 1 (2,78%)      |
